# Supplementary material for: Geo-locate project: a novel approach to resolving meteorological station location issues with the assistance of undergraduate students
Source: Copernicus journal article supplement (doi:10.5194/gc-2-157-2019), 2019-11-08
Supplement: Supplementary file 1 [file Supplementary_1 Table S1 and S2 shows list of sources with station location issues.pdf › Supplementary_material/Supplementary_1 Table S1 and S2 shows list of sources with station location issues.pdf]

Table S1 Shows the data sources and the number of daily stations with location issues per source.

| No. | Data Source Name                                                           | No. of Stations |
|-----|----------------------------------------------------------------------------|-----------------|
| 1   | Data originated from NOAA's/NCEI Global Summary of the Day (GSOD) Product  | 2506            |
| 2   | Global Historical Climate Network Dataset                                  | 1649            |
| 3   | The European Climate Assessment and Dataset                                | 881             |
| 4   | South Asia Climate Assessment Dataset                                      | 442             |
| 5   | UK Met office                                                              | 421             |
| 6   | Environment Canada National Climate Data and Information Archive           | 318             |
| 7   | Marcus Flarup                                                              | 235             |
| 8   | National Climate Centre Bureau of Meteorology PO Box 1289K Melbourne       | 222             |
| 9   | Blair Trewin                                                               | 186             |
| 10  | Pauli Jokinen                                                              | 125             |
| 11  | Eirik Forland                                                              | 100             |
| 12  | Albert Klein Tank                                                          | 93              |
| 13  | Claus Kern-Hansen                                                          | 76              |
| 14  | These data originated from the Japan Meteorological Agency                 | 66              |
| 15  | Antarctic Meteorological Research Center (AMRC) University Wisconsin       | 65              |
| 16  | Vyacheslav Razuvaev                                                        | 63              |
| 17  | The Southeast Asian Climate Assessment and Dataset                         | 60              |
| 18  | Dr. Ir. Wanny K. Adidarma                                                  | 56              |
| 19  | Dr V.N. Razuvaev and Dr. O.N. Bulygina Oak Ridge National laboratory, USA  | 50              |
| 20  | JAMSTEC digitization project                                               | 43              |
| 21  | William Angel AS part of the CDMP program                                  | 42              |
| 22  | GSN network                                                                | 33              |
| 23  | Antonio Mestre Barcelo                                                     | 31              |
| 24  | National Climate Data Center (DWD)                                         | 28              |
| 25  | Olga Zolina                                                                | 20              |
| 26  | Marc Prohom                                                                | 16              |
| 27  | National Institute for Space Research (INPE) in Brazil                     | 15              |
| 28  | Maria Michelaraki                                                          | 11              |
| 29  | Australian Government Bureau of Meteorology                                | 10              |
| 30  | Michael Panayiotis                                                         | 9               |
| 31  | Deutscher Wetterdienst (DWD)                                               | 8               |
| 32  | Kaupo Mandla                                                               | 8               |
| 33  | Data originated used to create The International Surface Pressure Databank | 7               |
| 34  | MEDARE Initiative                                                          | 7               |
| 35  | Philippe Dandin                                                            | 7               |
| 36  | Tanja Likso                                                                | 7               |
| 37  | Brazil's Instituto Nacional de Meteorologia (INMET)                        | 6               |
| 38  | Data was provided by Jayashree Revadekar India Meteorological Department   | 6               |
| 39  | Data was provided by Juerg Luterbacher                                     | 6               |
| 40  | Theo Brandsma                                                              | 6               |
| 41  | Midwestern Regional Climate Center (MRCC)                                  | 5               |
| 42  | Avner Furshpan                                                             | 4               |
| 43  | Toranna Palsdottir                                                         | 3               |
| 44  | Data was provided by Ludvig Isaksson                                       | 2               |

Table S1 continued.

| No. | Data Source Name                                                            | No. of Stations |
|-----|-----------------------------------------------------------------------------|-----------------|
| 45  | Markku Rummukainen                                                          | 2               |
| 46  | Maurizio Maugeri                                                            | 2               |
| 47  | National Climate Information Centre                                         | 2               |
| 48  | Olga Pachaliuk                                                              | 2               |
| 49  | Peter Fisher, Research and Development Division, Met Service of New Zealand | 2               |
| 50  | Tanja Cegnar                                                                | 2               |
| 51  | Tiziano Colombo                                                             | 2               |
| 52  | Amran B Osman                                                               | 1               |
| 53  | CIRCE project                                                               | 1               |
| 54  | Conor Daly                                                                  | 1               |
| 55  | Eglantina Bruci                                                             | 1               |
| 56  | Fatima Coelho                                                               | 1               |
| 57  | Marcus Keane                                                                | 1               |
| 58  | Maria Antonia Valente                                                       | 1               |

Table S2 Shows the data sources and the number of monthly stations with location issues per source.

| No. | Data Source Name                                                           | No. of Stations |
|-----|----------------------------------------------------------------------------|-----------------|
| 1   | UK Met office                                                              | 2511            |
| 2   | Monthly Climatic Data of the World (MCDW)                                  | 844             |
| 3   | World Weather Record NOA multiple sources                                  | 784             |
| 4   | World Monthly Surface Station Climatology Dataset                          | 774             |
| 5   | Preliminary CLIMAT data                                                    | 527             |
| 6   | Environment Canada National Climate Data and Information Archive           | 425             |
| 7   | Russource GHCND nonconus multiple sources                                  | 418             |
| 8   | Russource ISH multiple sources                                             | 346             |
| 9   | Royal Netherlands Meteorological Institute (KNMI)                          | 287             |
| 10  | NWS CLIMAT streams that are sent to NCDC                                   | 276             |
| 11  | Russource Canada Multiple sources                                          | 240             |
| 12  | Russource GHCND Multiple sources                                           | 225             |
| 13  | National Snow and Ice data Central Asia Temperature and Precipitation Data | 210             |
| 14  | Russource CLIMAT Multiple sources                                          | 207             |
| 15  | Russ Vose analysis of Mr Griffiths from various countries around the world | 180             |
| 16  | Russource TDXX MERGE Multiple Sources                                      | 167             |
| 17  | Russource GRIFFITHS Multiple sources                                       | 130             |
| 18  | National Centers for Environmental Information (NCEI)                      | 128             |
| 19  | Russource Australia Multiple sources                                       | 91              |
| 20  | Norwegian Meteorological Institutes eKlima portal                          | 61              |
| 21  | International Arctic Research Center at the University of Alaska Fairbanks | 50              |
| 22  | Russource Australia WWR Multiple sources                                   | 49              |
| 23  | Russource GRIFFITHS SA Multiple Sources                                    | 48              |
| 24  | Scar Reader Project Antarctic Meteorological Research Center (AMRC) USA    | 26              |
| 25  | Russource SOUTH AFRICA Multiple sources                                    | 25              |
| 26  | Russource Australia de Multiple sources                                    | 24              |

Table S2 continued.

| No. | Data Source Name                                       | No. of Stations |
|-----|--------------------------------------------------------|-----------------|
| 27  | Russource NEW ZEALAND Multiple sources                 | 23              |
| 28  | John Christy of UAH British E Africa Met Dept          | 18              |
| 29  | Russource Brazil Multiple sources                      | 9               |
| 30  | Deutscher Wetterdienst (DWD)                           | 7               |
| 31  | Russource Chile Multiple sources                       | 6               |
| 32  | Russource INDONESIA Multiple sources                   | 6               |
| 33  | Russource MEXICO Multiple sources                      | 6               |
| 34  | Russource Cuba Multiple Sources                        | 5               |
| 35  | Antarctic Meteorological Research Center               | 4               |
| 36  | German Meteorological Service Deutscher Wetterdienst   | 4               |
| 37  | Russource FWA Multiple sources                         | 3               |
| 38  | Russource FAO Multiple sources                         | 2               |
| 39  | Central Institute for Meteorology and Geodynamics ZAMG | 1               |
| 40  | Russource Conus Climat Multiple Sources                | 1               |
| 41  | Russource GREECE Multiple sources                      | 1               |
