# Supplementary material for: Geo-locate project: a novel approach to resolving meteorological station location issues with the assistance of undergraduate students
Source: Copernicus journal article supplement (doi:10.5194/gc-2-157-2019), 2019-11-08
Supplement: Supplementary file 1 [file Supplementary_3 student station sheet template.xlsx]

## Sheet: Sheet1
UID	STATION NAME	ORIGINAL_LATITUDE	ORIGINAL_LONGITUDE	ORIGINAL_ELEVATION_METRES_ASL	ORIGINAL_COUNTRY	REVISED_LATITUDE	REVISED_LONGITUDE	REVISED_ELEVATION_METRES_ASL	REVISED_COUNTRY	REVISED_INFORMATION _SOURCE	STEP 1	STEP 2	STEP3	COMMENTS	Web address	Verified Results
