# Supplementary material for: Geo-locate project: a novel approach to resolving meteorological station location issues with the assistance of undergraduate students
Source: Copernicus journal article supplement (doi:10.5194/gc-2-157-2019), 2019-11-08
Supplement: Supplementary file 2 [file Supplementary_6 Example student sheet completed.xlsx]

## Sheet: Sheet1
UID	STATION_ NAME	ORIGINAL_ LATITUDE	ORIGINAL_ LONGITUDE	ORIGINAL_ ELEVATION_ METRES_ASL	ORIGINAL_COUNTRY	REVISED_ LATITUDE	REVISED_ LONGITUDE	REVISED_ ELEVATION_ MASL	REVISED_COUNTRY	REVISED_ INFORMATION _SOURCE	STEP_1	STEP_ 2	STEP_ 3	DISTANCE	COMMENTS
801	MENES	-6.2259	105.57	11	NA	-6.3847	105.93	104	Indonesia	Google earth	Navigated to the OSCAR webpage and entered my station names in to the dropdown menu.This station name does not appear on OSCAR webpage.	This station does not appear on a google search.	The station location was found using Google Earth. Used Google map to find the station town/city centre location and google search to find area of location	12.67	Not In OSCAR not found in weather station in google search. Used Google map to find the station town/city centre location and google search to find area of location. Station is located in Western Indonesia.
802	PANGKAL PINANG	-2.759	106.7	2	NA	-2.16667	106.133	33	Indonesia	OSCAR	Navigated to the OSCAR webpage and entered my station names in to the dropdown menu. This station is on OSCAR system.	NA	NA	NA	Found station in OSCAR system.This station is situated on a island off Sumatra in Indonesia
803	DAET CAMARIES	14.712	123	NA	NA	14.1286	122.983	3	Philippines	OSCAR	Navigated to the OSCAR webpage and entered my station names in to the dropdown menu. This station is on OSCAR system.	NA	NA	NA	Found station in OSCAR system.This station is situated on a islands of the Philippines
804	ROTUMA	-12.3	177.3	26	NA	-12.5	177.05	26	Fiji	OSCAR	Navigated to the OSCAR webpage and entered my station names in to the dropdown menu. This station is on OSCAR system.	NA	NA	NA	Found station in OSCAR system.This is an island off Fiji in the South Pacific
805	MARGAPADANG	-6.5548	109.112	3	NA	-6.922391	109.204	17	Indonesia	Google earth	Navigated to the OSCAR webpage and entered my station names in to the dropdown menu.This station does not appear on OSCAR system.	Using Google search I typed in the station name and the key words weather sation latituide and longitude. Nothing was returned in the search.	The station location was found using Google Earth. Used Google map to find the station town/city centre location and Google search to find area of location	15.04	Not In OSCAR not found in weather station in google search. Used Google map to find the station town/city centre location and google search to find area of location. Station is located in Western Indonesia.
