# Supplementary material for: Geo-locate project: a novel approach to resolving meteorological station location issues with the assistance of undergraduate students
Source: Copernicus journal article supplement (doi:10.5194/gc-2-157-2019), 2019-11-08
Supplement: Supplementary file [file gc-2-157-2019-supplement-title-page.pdf › gc-2-157-2019-supplement-title-page.pdf]

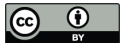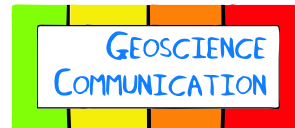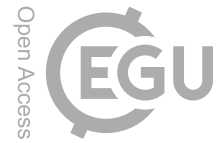

## *Supplement of*

# **Geo-locate project: a novel approach to resolving meteorological station location issues with the assistance of undergraduate students**

**Simon Noone et al.**

*Correspondence to:* Simon Noone ([simon.noone@mu.ie](mailto:simon.noone@mu.ie))

- [gc-2-157-2019-supplement-title-page.pdf](#)
- [Supplementary\\_material](#)
  - [Supplementary\\_1 Table S1 and S2 shows list of sources with station location issues.pdf](#)
  - [Supplementary\\_2 student handout sheet guidance and steps.pdf](#)
  - [Supplementary\\_3 student station sheet template.xlsx](#)
  - [Supplementary\\_4 student survey feedback sheet.pdf](#)
  - [Supplementary\\_5 list of students who participated in the Geolocate projects.pdf](#)
  - [Supplementary\\_6 Example student sheet completed.xlsx](#)

The copyright of individual parts of the supplement might differ from the CC BY 4.0 License.
